# Supplementary material for: Genome-Wide Analyses of MicroRNA Profiling in Interleukin-27 Treated Monocyte-Derived Human Dendritic Cells Using Deep Sequencing: A Pilot Study
Source: MDPI journal article supplement (doi:10.3390/ijms18050925), 2017-04-28
Supplement: s1 [file s1]

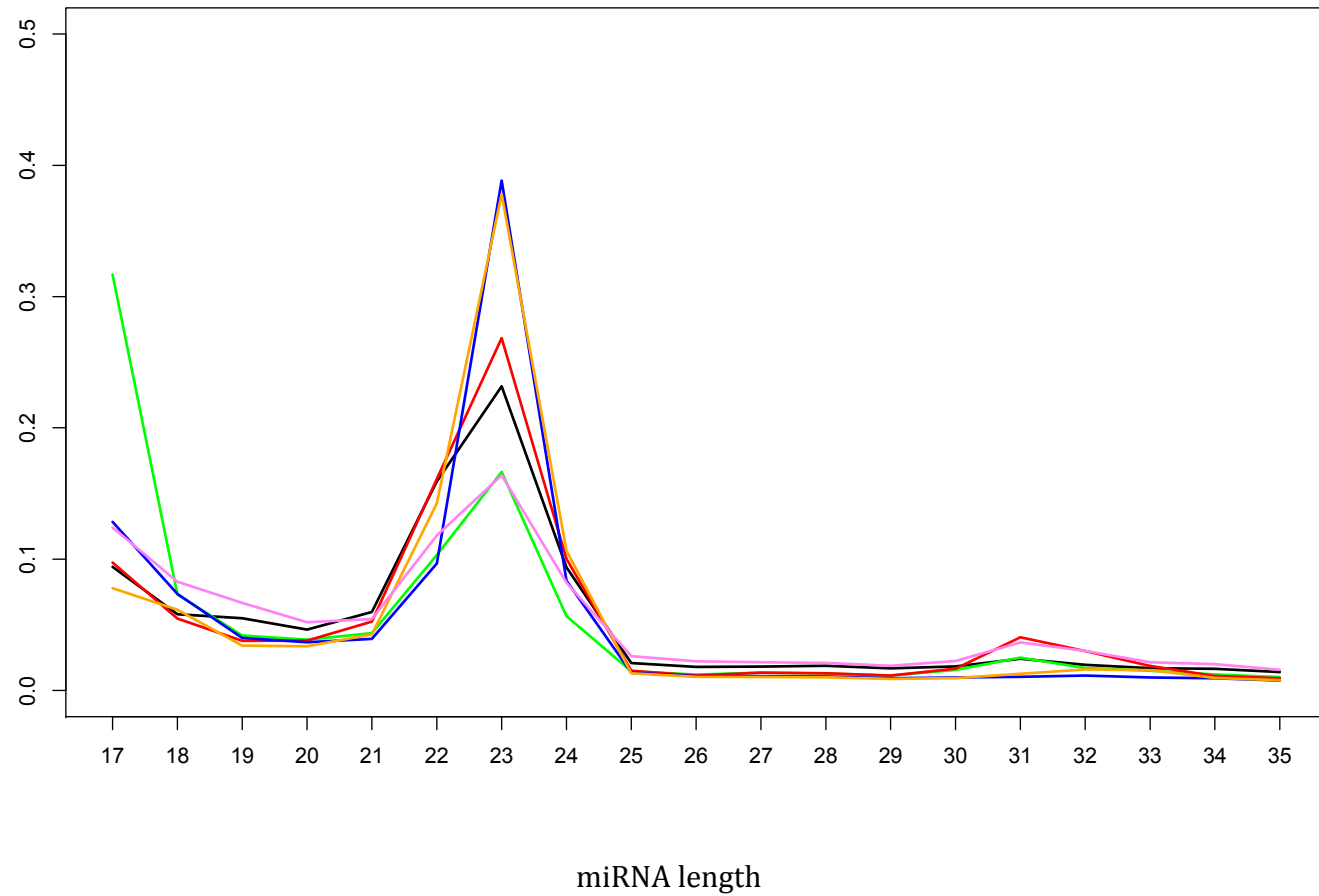

**Figure S1.** Length distribution of microRNAs (miRNAs) reads from immature dendritic cells (iDCs) and IL-27-treated iDCs (27DCs). Different colors represent different samples.

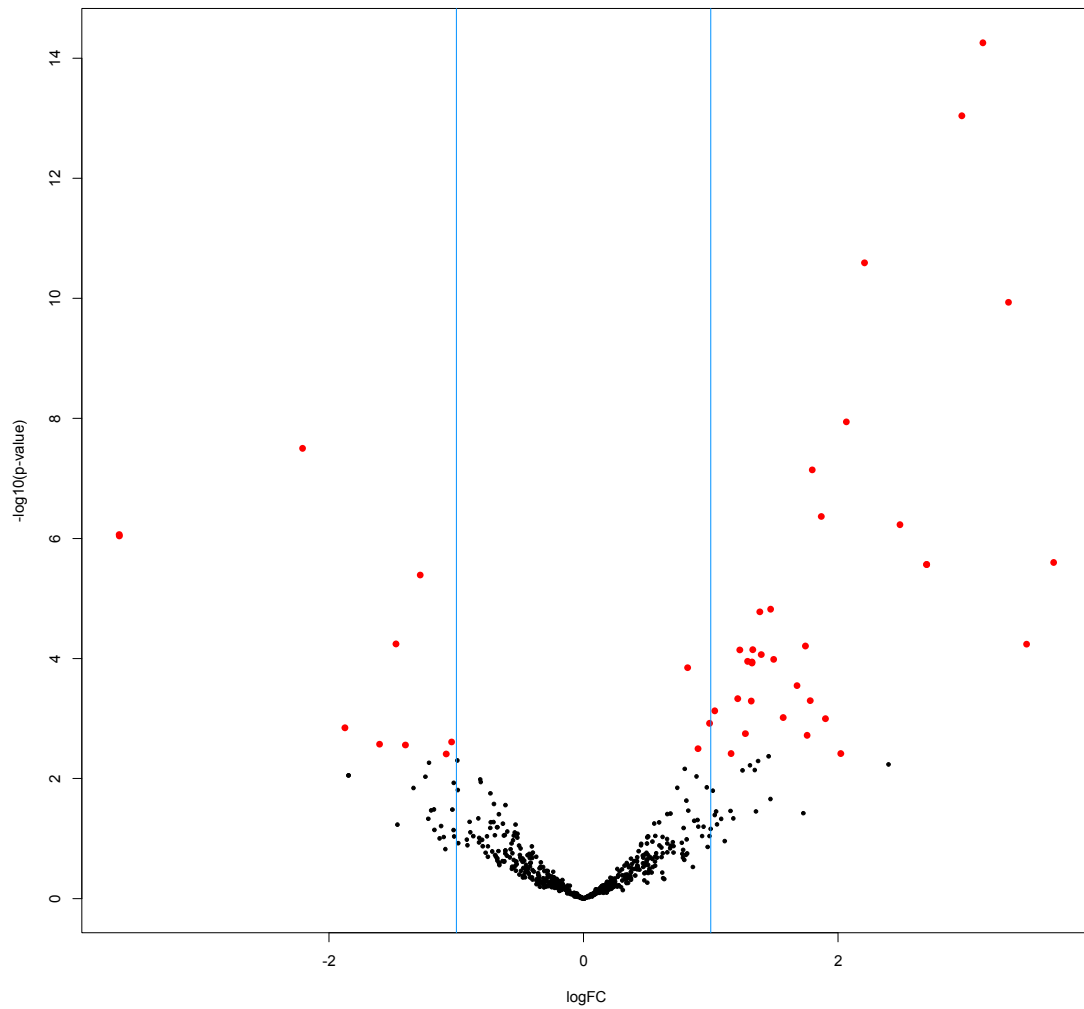

**Figure S2.** Volcano plot of known MicroRNAs (miRNAs) profiles. The x-axis shows the log<sub>2</sub>fold-change of IL-27-treated iDCs (27DCs) vs. immature dendritic cells (iDCs), while the y-axis shows the  $-\log_{10}$  P-value of miRNA. The red point in the plot represents the differentially expressed miRNAs with statistical significance. The vertical lines correspond to a two-fold change in expression (up or down).

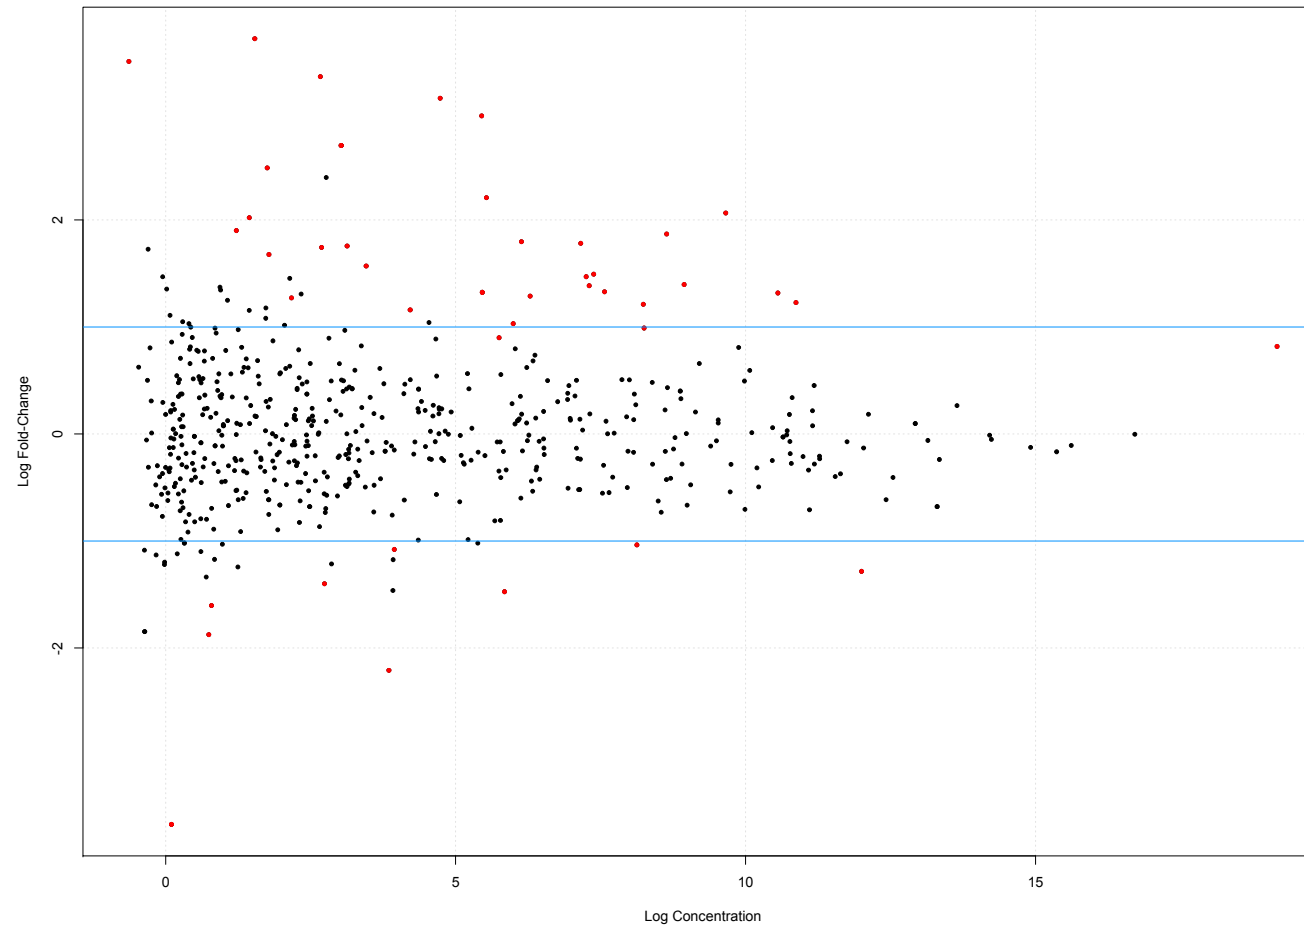

**Figure S3.** M-A plot. The MA plot shows for each microRNA (miRNA) (dot) the difference in expression levels between immature dendritic cells (iDCs) and IL-27-treated iDCs (27DCs) (M, log<sub>2</sub> fold change; y axis) compared to their mean expression level (A, log<sub>2</sub> transformed normalized miRNA read count; x axis). Blue line indicates twofold difference in expression.

A.

|                        |              |
|------------------------|--------------|
| Provisional ID         | : chr10_2389 |
| Score total            | : 195.8      |
| Score for star read(s) | : 3.9        |
| Score for read counts  | : 189.3      |
| Score for mfe          | : 1.7        |
| Score for randfold     | : 1.6        |
| Score for cons. seed   | : -0.6       |
| Total read count       | : 383        |
| Mature read count      | : 358        |
| Loop read count        | : 0          |
| Star read count        | : 25         |

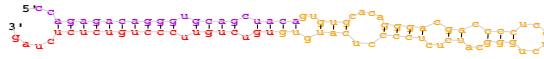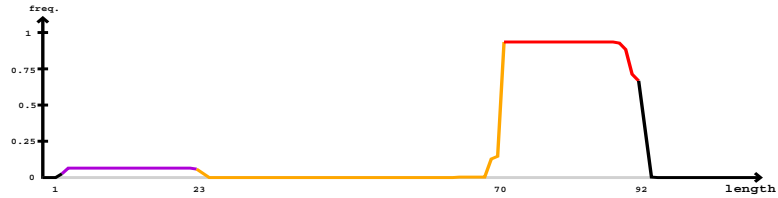[illegible]

# QXBT1

chr10:48966435..48966526:+

B.

|                        |             |
|------------------------|-------------|
| Provisional ID         | : chr2_7214 |
| Score total            | : 1.1       |
| Score for star read(s) | : -1.3      |
| Score for read counts  | : -2.3      |
| Score for mfe          | : 0.2       |
| Score for randfold     | : 1.6       |
| Score for cons. seed   | : 3         |
| Total read count       | : 7         |
| Mature read count      | : 7         |
| Loop read count        | : 0         |
| Star read count        | : 0         |

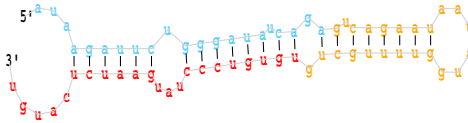

QXBT2  
chr2:94772066..94772132:-

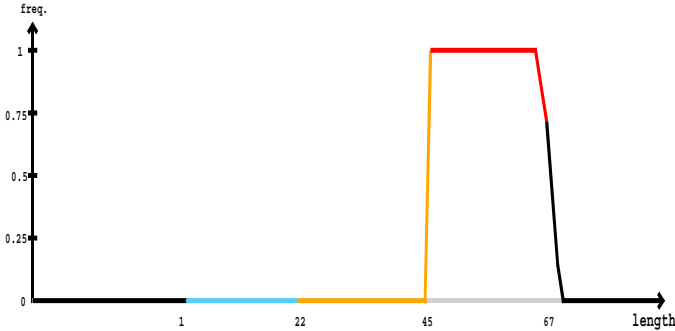

| Star |                                                                                            | Mature                                                                                |     |     |        |  |
|------|--------------------------------------------------------------------------------------------|---------------------------------------------------------------------------------------|-----|-----|--------|--|
| 5'-  | auugcawuuugcucugugauaagac                                                                  | uaagaauucugggaucagagucagagaaauaauugguuugcuguguguccuauagaaucaucuguggaauuguaauccuuaauug | -3' | exp |        |  |
|      | (((((.....)))))).....(((.....(((.....(((.....(((.....)))))))).)))))).....(((.....))))..... | reads                                                                                 | mm  |     | sample |  |
|      | .....uuguguccuauagaaucaucaug.....                                                          | 1                                                                                     | 0   |     | iD4    |  |
|      | .....uuguguccuauagaaucaucaug.....                                                          | 1                                                                                     | 0   |     | iD4    |  |
|      | .....uuguguccuauagaaucaucaug.....                                                          | 4                                                                                     | 0   |     | iD4    |  |
|      | .....uuguguccuauagaaucaucaugugf.....                                                       | 1                                                                                     | 1   |     | iD4    |  |

C.

|                        |              |
|------------------------|--------------|
| Provisional ID         | : chr9_19385 |
| Score total            | : 1.4        |
| Score for star read(s) | : -1.3       |
| Score for read counts  | : 0          |
| Score for mfe          | : 1.7        |
| Score for randfold     | : 1.6        |
| Score for cons. seed   | : -0.6       |
| Total read count       | : 155        |
| Mature read count      | : 92         |
| Loop read count        | : 10         |
| Star read count        | : 53         |

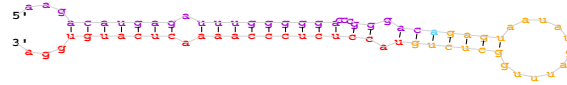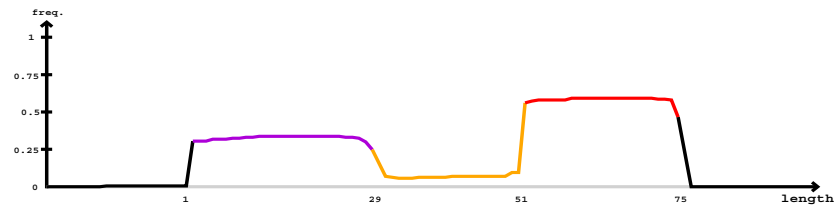[illegible]

# QXBT3

chr9:40297854..40297928:+

D.

|                        |              |
|------------------------|--------------|
| Provisional ID         | : chr16_4548 |
| Score total            | : 0.9        |
| Score for star read(s) | : -1.3       |
| Score for star counts  | : 0          |
| Score for mfe          | : 1.2        |
| Score for randfold     | : 1.6        |
| Score for cons. seed   | : -0.6       |
| Total read count       | : 39         |
| Mature read count      | : 39         |
| Loop read count        | : 0          |
| Star read count        | : 0          |

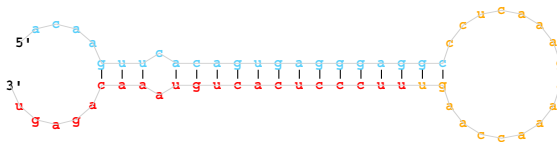

# QXBT4

chr16:21647236..21647297:-

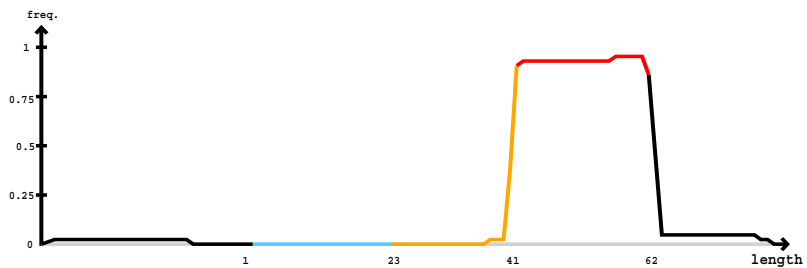[illegible]

**E.**

|                        |              |
|------------------------|--------------|
| Provisional ID         | : chr4_10978 |
| Score total            | : 65.1       |
| Score for star read(s) | : 3.9        |
| Score for read counts  | : 56.7       |
| Score for mfe          | : 0          |
| Score for randfold     | : 1.6        |
| Score for cons. seed   | : 3          |
| Total read count       | : 123        |
| Mature read count      | : 63         |
| Loop read count        | : 0          |
| Star read count        | : 60         |

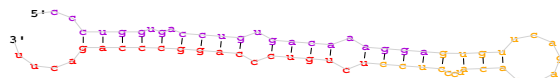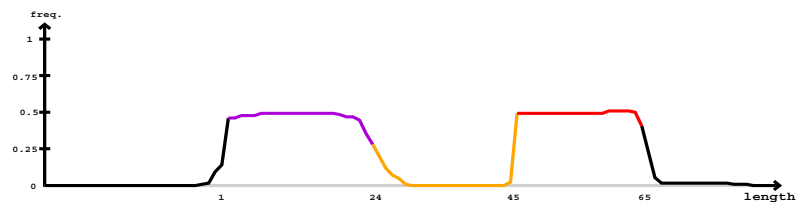

# QXBT5

chr4:77048486..77048550:-

|    | Star                                                                                                           | Mature |       |     |        |
|----|----------------------------------------------------------------------------------------------------------------|--------|-------|-----|--------|
| 5' | uuuugucuaacgcccuccaagcacaacccuggugacccugugacaaaggaguguuacaguuacaucuccuccucugucccaggccacagucuccaaggacaacagcaagc |        | -3'   | obs |        |
|    | uuuugucuaacgcccuccaagcacaacccuggugacccugugacaaaggaguguuacaguuacaucuccuccucugucccaggccacagucuccaaggacaacagcaagc |        | exp   |     |        |
|    | ...(((((.....(((.....(((.....(((.....))).....))).....))).....))).....))).....))).....))).....))).....))).....  |        | reads | nm  | sample |
|    | .....cacaccugugacccugugag.....                                                                                 |        | 1     | 0   | 1D2    |
|    | .....cacaccugugacccugugag.....                                                                                 |        | 1     | 0   | 1D2    |
|    | .....cacccugugacccugugacaa.....                                                                                |        | 2     | 0   | 1D2    |
|    | .....cacccugugacccugugacaaag.....                                                                              |        | 7     | 0   | 1D2    |
|    | .....cacccugugacccugugacaaagA.....                                                                             |        | 1     | 1   | 1D2    |
|    | .....cacccugugacccugugag.....                                                                                  |        | 1     | 0   | 1D2    |
|    | .....cacccugugacccugugacaaag.....                                                                              |        | 2     | 0   | 1D2    |
|    | .....cacccugugacccugugacaaagU.....                                                                             |        | 1     | 1   | 1D2    |
|    | .....cacccugugacccugugacaaagga.....                                                                            |        | 1     | 0   | 1D2    |
|    | .....cacccugugacccugugacaaaggagu.....                                                                          |        | 1     | 0   | 1D2    |
|    | .....ccucugugacccugugacaa.....                                                                                 |        | 1     | 0   | 1D2    |
|    | .....ccucugugacccugugacaaag.....                                                                               |        | 3     | 0   | 1D2    |
|    | .....ccucugugacccugugacaaagg.....                                                                              |        | 7     | 0   | 1D2    |
|    | .....Uccucugugacccugugacaaagga.....                                                                            |        | 1     | 1   | 1D2    |
|    | .....ccucugugacccugugacaaaggU.....                                                                             |        | 1     | 1   | 1D2    |
|    | .....ccucugugacccugugacaaagga.....                                                                             |        | 13    | 0   | 1D2    |
|    | .....ccucugugacccugugacaaaggd.....                                                                             |        | 2     | 1   | 1D2    |
|    | .....ccucugugacccugugacaaaggag.....                                                                            |        | 2     | 0   | 1D2    |
|    | .....ccucugugacccugugacaaaggga.....                                                                            |        | 1     | 1   | 1D2    |
|    | .....ccucugugacccugugacaaaggagu.....                                                                           |        | 2     | 0   | 1D2    |
|    | .....ccucugugacccugugacaaaggagU.....                                                                           |        | 1     | 1   | 1D2    |
|    | .....ccucugugacccugugacaaaggagug.....                                                                          |        | 1     | 0   | 1D2    |
|    | .....ccucugugacccugugacaaaggagugU.....                                                                         |        | 4     | 0   | 1D2    |
|    | .....ccucugugacccugugacaaaggagugG.....                                                                         |        | 1     | 1   | 1D2    |
|    | .....ccucugugacccugugacaaaggagugU.....                                                                         |        | 1     | 1   | 1D2    |
|    | .....cugugacccugugacaaaggagu.....                                                                              |        | 1     | 1   | 1D2    |
|    | .....cugugacccugugacaaaggagu.....                                                                              |        | 1     | 0   | 1D2    |
|    | .....cugugacccugugacaaaggagug.....                                                                             |        | 2     | 0   | 1D2    |
|    | .....cucugucccaggcccacagacU.....                                                                               |        | 1     | 1   | 1D2    |
|    | .....cucugucccaggcccacagacuu.....                                                                              |        | 2     | 0   | 1D2    |
|    | .....ucugucccaggcccacagac.....                                                                                 |        | 1     | 0   | 1D2    |
|    | .....ucugucccaggcccacagacU.....                                                                                |        | 11    | 0   | 1D2    |
|    | .....ucugucccaggcccacagacC.....                                                                                |        | 1     | 1   | 1D2    |



**F.**

|                        |             |
|------------------------|-------------|
| Provisional ID         | : chr3_8327 |
| Score total            | : 1.9       |
| Score for star read(s) | : -1.3      |
| Score for read counts  | : 0         |
| Score for mfe          | : 2.2       |
| Score for randfold     | : 1.6       |
| Score for cons. seed   | : -0.6      |
| Total read count       | : 19        |
| Mature read count      | : 19        |
| Loop read count        | : 0         |
| Star read count        | : 0         |

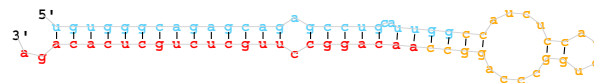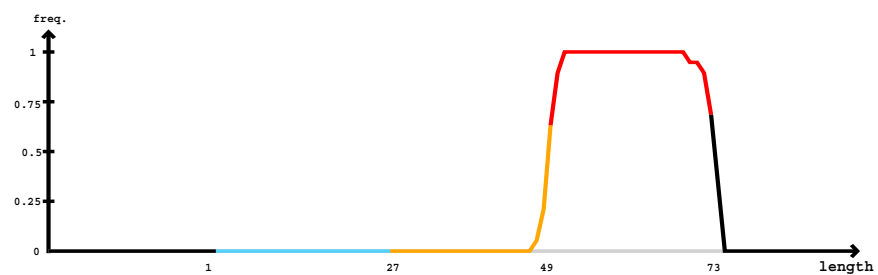

# QXBT6

chr3:52523356..52523428:+

[illegible]

**G.**

|                        |              |
|------------------------|--------------|
| Provisional ID         | : chr10_1977 |
| Score total            | : 6.1        |
| Score for star read(s) | : -1.3       |
| Score for read counts  | : 0          |
| Score for mfe          | : 2.8        |
| Score for randfold     | : 1.6        |
| Score for cons. seed   | : 3          |
| Total read count       | : 91         |
| Mature read count      | : 80         |
| Loop read count        | : 0          |
| Star read count        | : 11         |

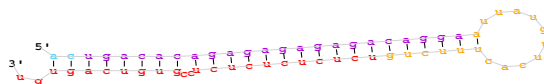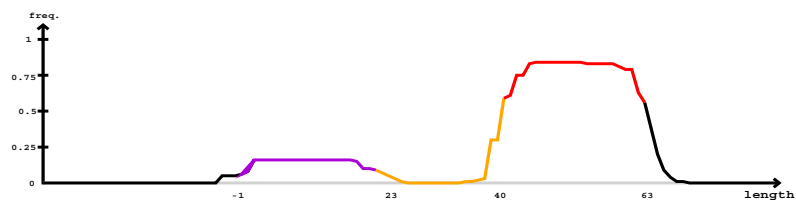

**QXBT7**

chr10:48827482..48827544:+

[illegible]

H.

|                        |              |
|------------------------|--------------|
| Provisional ID         | : chr15_4958 |
| Score total            | : 1.6        |
| Score for star read(s) | : -1.3       |
| Score for read counts  | : 0          |
| Score for mfe          | : 2.1        |
| Score for randfold     | : -2.2       |
| Score for cons. seed   | : 3          |
| Total read count       | : 22         |
| Mature read count      | : 22         |
| Loop read count        | : 0          |
| Star read count        | : 0          |

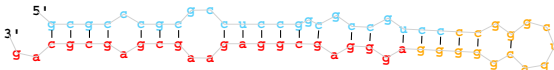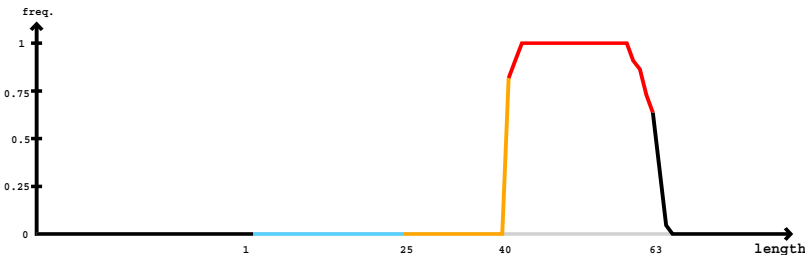

# QXBT8

chr15:45167265..45167327:-

[illegible]

I.

|                        |              |
|------------------------|--------------|
| Provisional ID         | : chr17_8017 |
| Score total            | : 1.5        |
| Score for star read(s) | : -1.3       |
| Score for read counts  | : 0          |
| Score for mfe          | : 2          |
| Score for ransfold     | : -2.2       |
| Score for cons. seed   | : 3          |
| Total read count       | : 40         |
| Mature read count      | : 37         |
| Loop read count        | : 0          |
| Star read count        | : 3          |

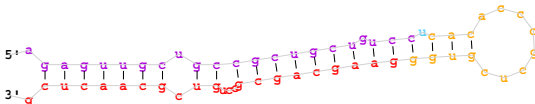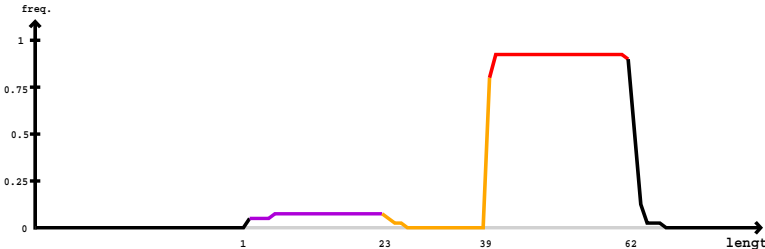

QXBT9  
chr17:78140754..78140815:+

[illegible]

J.

|                        |            |
|------------------------|------------|
| Provisional ID         | : chr1_171 |
| Score total            | : 12.4     |
| Score for star read(s) | : 3.9      |
| Score for read counts  | : 8.3      |
| Score for mfe          | : -0.7     |
| Score for randfold     | : 1.6      |
| Score for cons. seed   | : -0.6     |
| Total read count       | : 28       |
| Mature read count      | : 27       |
| Loop read count        | : 0        |
| Star read count        | : 1        |

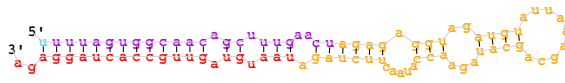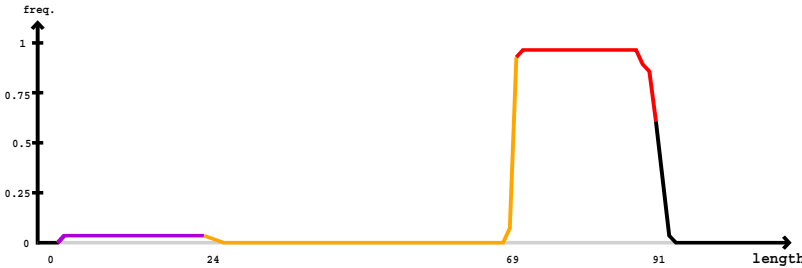

**QXBT10**  
chr1:19910424..19910514:+

[illegible]

K.

Provisional ID : chr9\_16125  
Score total : 5.8  
Score for star read(s) : -1.3  
Score for read counts : 0  
Score for mfe : 2.5  
Score for randfold : 1.6  
Score for cons. seed : 3  
Total read count : 27  
Mature read count : 26  
Loop read count : 0  
Star read count : 1

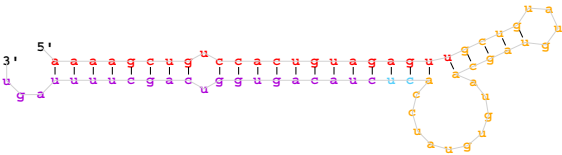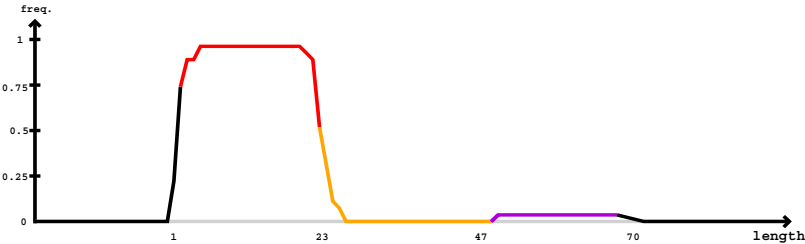

QXBT11  
chr9:32456301..32456370:-

| Mature                                                                                                        |  | Star |  |  |  |     |        |
|---------------------------------------------------------------------------------------------------------------|--|------|--|--|--|-----|--------|
| 5'                                                                                                            |  |      |  |  |  | -3' | obs    |
| ccauuuuuugcuuacuacuaaaagcuguccacuguaagaguugcuguuagucaauguguauccacucacagugucagcucuuaagagagagcuaaaaaugauaaaaa   |  |      |  |  |  |     | exp    |
| ccauuuuuugcuuacuacuaaaagcuguccacuguaagaguugcuguuagucaauguguauccacucacagugucagcucuuaagagagagcuaaaaaugauaaaaa   |  |      |  |  |  |     |        |
| .(((((((((((((((((((((((((((((((((((((((((((((((((((((((((((((((((((((((((((((((((((((((((((((((((((((((((((( |  |      |  |  |  |     |        |
| .....uaaaGgcuguccacuguaagagu.....                                                                             |  |      |  |  |  |     | reads  |
| .....uaaaagcuguccacuguaagagu.....                                                                             |  |      |  |  |  |     | mm     |
| .....uGaaagcuguccacuguaagagu.....                                                                             |  |      |  |  |  |     | sample |
| .....uaaaagcuguccacuguaagagC.....                                                                             |  |      |  |  |  |     |        |
| .....aaaagcuguccacuguaagag.....                                                                               |  |      |  |  |  |     |        |
| .....aaaagcuguccacuguaagagu.....                                                                              |  |      |  |  |  |     |        |
| .....aaaGgcuguccacuguaagagu.....                                                                              |  |      |  |  |  |     |        |
| .....aaaagcuguccacuguaagagC.....                                                                              |  |      |  |  |  |     |        |
| .....aaaGgcuguccacuguaagagu.....                                                                              |  |      |  |  |  |     |        |
| .....aaaagcuguccacuguaagaguG.....                                                                             |  |      |  |  |  |     |        |
| .....aaaagcuguccacuguaagagu.....                                                                              |  |      |  |  |  |     |        |
| .....aGagcuguccacuguaaga.....                                                                                 |  |      |  |  |  |     |        |
| .....aaagcuguccacuguaagagu.....                                                                               |  |      |  |  |  |     |        |
| .....aaagcuguccacuguaagaguG.....                                                                              |  |      |  |  |  |     |        |
| .....agcuguccacuguaagaguG.....                                                                                |  |      |  |  |  |     |        |
| .....agcuguccacuguaagaguG.....                                                                                |  |      |  |  |  |     |        |
| .....cuacGgugguagcucuuaagu.....                                                                               |  |      |  |  |  |     |        |

**L.**

|                        |              |
|------------------------|--------------|
| Provisional ID         | : chr4_12297 |
| Score total            | : 0.4        |
| Score for star read(s) | : -1.3       |
| Score for read counts  | : 0          |
| Score for mfe          | : 0.9        |
| Score for randfold     | : -2.2       |
| Score for cons. seed   | : 3          |
| Total read count       | : 31071      |
| Mature read count      | : 31071      |
| Loop read count        | : 0          |
| Star read count        | : 0          |

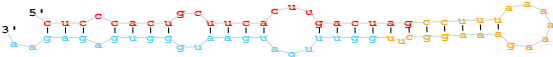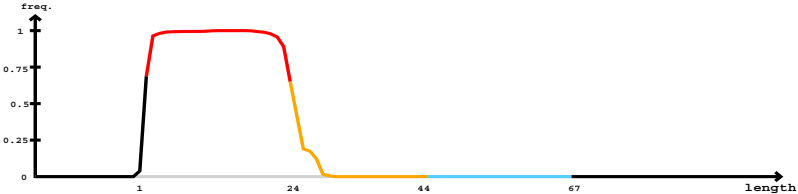

# QXBT12

chr4:165400665..165400731:-

[illegible]

M.

|                        |              |
|------------------------|--------------|
| Provisional ID         | : chr14_3835 |
| Score total            | : 0          |
| Score for star read(s) | : -1.3       |
| Score for read counts  | : 0          |
| Score for mfe          | : 0.5        |
| Score for randfold     | : -2.2       |
| Score for cons. seed   | : 3          |
| Total read count       | : 124795     |
| Mature read count      | : 124795     |
| Loop read count        | : 0          |
| Star read count        | : 0          |

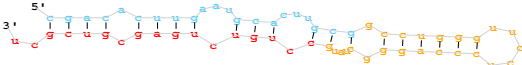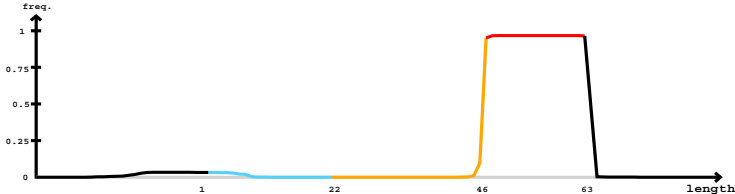

# QXBT13

chr14:16057563..16057625:+

[illegible]



N.

|                        |              |
|------------------------|--------------|
| Provisional ID         | : chr22_9127 |
| Score total            | : 19694.9    |
| Score for star read(s) | : 3.9        |
| Score for read counts  | : 19693.7    |
| Score for mfe          | : 0.2        |
| Score for randfold     | : -2.2       |
| Score for cons. seed   | : -0.6       |
| Total read count       | : 38640      |
| Mature read count      | : 38019      |
| Loop read count        | : 7          |
| Star read count        | : 614        |

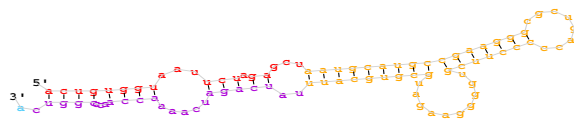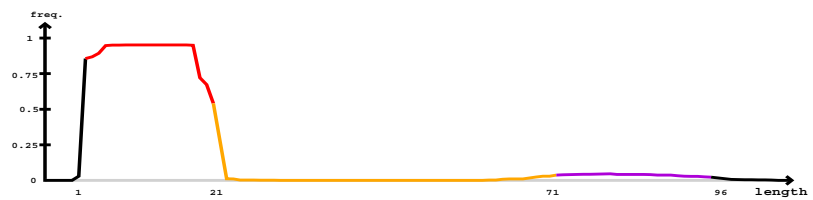[illegible]

# QXBT14

chr22:11629695..11629789:+

O.

Provisional ID : chr4\_26072  
Score total : 18.3  
Score for star read(s) : 3.9  
Score for read counts : 7.8  
Score for mfe : 2  
Score for randfold : 1.6  
Score for cons. seed : 3  
Total read count : 27  
Mature read count : 24  
Loop read count : 0  
Star read count : 3

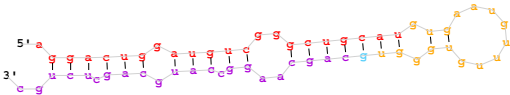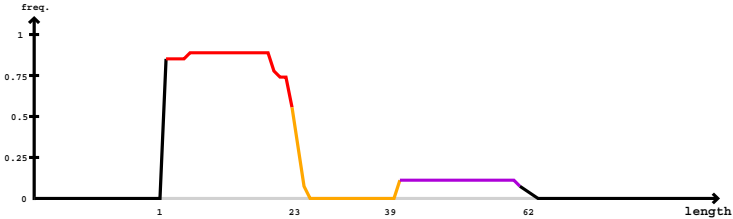

QXBT15  
chr4:141707992..141708053:+

| Mature |                                                                                                                | Star |       |    |        |  |  |
|--------|----------------------------------------------------------------------------------------------------------------|------|-------|----|--------|--|--|
| 5' -   | uggagaggcagagcugcugcaggacuggaugucgggcugcagugaauguuuguggugcagcaaggccaugcagcucugcaguggccuuucaugggagguagucacau    | -3'  | obs   |    |        |  |  |
|        | uggagaggcagagcugcugcaggacuggaugucgggcugcagugaauguuuguggugcagcaaggccaugcagcucugcaguggccuuucaugggagguagucacau    |      | exp   |    |        |  |  |
|        | ..(((((((.....(((((((((((.....(((((((((((.....(((((((((((.....(((((((((((.....(((((((((((.....(((((((((((..... |      | reads | mm | sample |  |  |
|        | .....aggacuggaugucgggcugcau.....                                                                               |      | 2     | 0  | DC2    |  |  |
|        | .....aggacuggaugucgggcugcau.....                                                                               |      | 1     | 1  | DC2    |  |  |
|        | .....aggacuggaugucgggcugcau.....                                                                               |      | 2     | 0  | DC4    |  |  |
|        | .....aggacuggaugucgggcugcau.....                                                                               |      | 1     | 1  | DC4    |  |  |
|        | .....aggacuggaugucgggcugcau.....                                                                               |      | 1     | 1  | DC4    |  |  |
|        | .....aggacuggaugucgggcugcau.....                                                                               |      | 1     | 1  | DC4    |  |  |
|        | .....aggacuggaugucgggcugcau.....                                                                               |      | 2     | 0  | DC4    |  |  |
|        | .....aggacuggaugucgggcugcau.....                                                                               |      | 5     | 0  | DC4    |  |  |
|        | .....aggacuggaugucgggcugcau.....                                                                               |      | 1     | 1  | DC4    |  |  |
|        | .....aggacuggaugucgggcugcau.....                                                                               |      | 1     | 1  | DC4    |  |  |
|        | .....aggacuggaugucgggcugcau.....                                                                               |      | 1     | 1  | DC4    |  |  |
|        | .....aggacuggaugucgggcugcau.....                                                                               |      | 1     | 1  | DC4    |  |  |
|        | .....aggacuggaugucgggcugcau.....                                                                               |      | 1     | 1  | DC4    |  |  |
|        | .....aggacuggaugucgggcugcau.....                                                                               |      | 1     | 0  | DC4    |  |  |
|        | .....aggacuggaugucgggcugcau.....                                                                               |      | 1     | 1  | DC4    |  |  |
|        | .....aggacuggaugucgggcugcau.....                                                                               |      | 1     | 0  | DC7    |  |  |
|        | .....aggacuggaugucgggcugcau.....                                                                               |      | 1     | 0  | DC7    |  |  |
|        | .....aggacuggaugucgggcugcau.....                                                                               |      | 1     | 1  | DC7    |  |  |
|        | .....aggacuggaugucgggcugcau.....                                                                               |      | 1     | 1  | ID7    |  |  |
|        | .....aggacuggaugucgggcugcau.....                                                                               |      | 1     | 1  | ID2    |  |  |
|        | .....aggacuggaugucgggcugcau.....                                                                               |      | 1     | 0  | ID2    |  |  |

P.

|                        |   |             |
|------------------------|---|-------------|
| Provisional ID         | : | chr14_10595 |
| Score total            | : | 5.3         |
| Score for star read(s) | : | -1.3        |
| Score for read counts  | : | 0           |
| Score for mfe          | : | 2           |
| Score for randfold     | : | 1.6         |
| Score for cons. seed   | : | 3           |
| Total read count       | : | 16          |
| Mature read count      | : | 16          |
| Loop read count        | : | 0           |
| Star read count        | : | 0           |

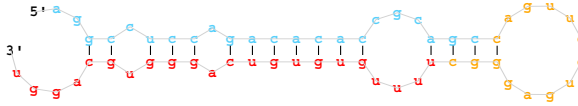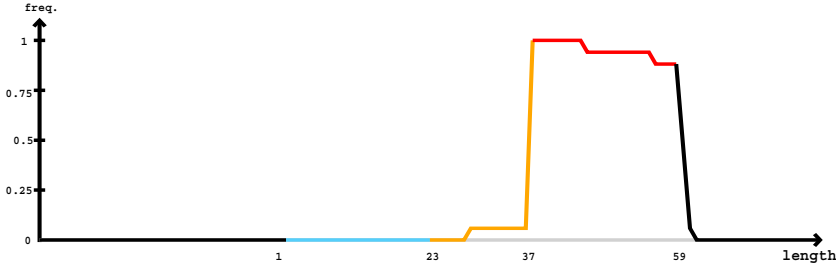

# QXBT16

chr14:94113640..94113698:+

[illegible]

Q.

Provisional ID : chr2\_19753  
Score total : 3.1  
Score for star read(s) : -1.3  
Score for read counts : -2.3  
Score for mfe : 2.2  
Score for randfold : 1.6  
Score for cons. seed : 3  
Total read count : 7  
Mature read count : 6  
Loop read count : 1  
Star read count : 0

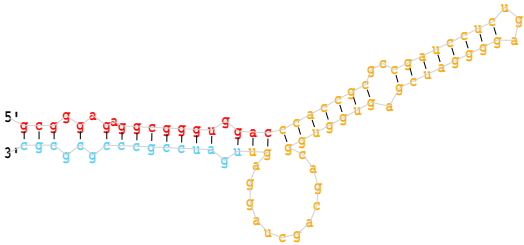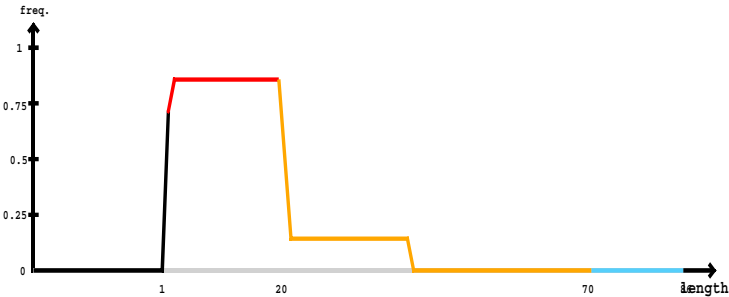

QXBT17  
chr2:136117376..136117461:-

| Mature |                                                                                         | Star               |       |     |        |  |
|--------|-----------------------------------------------------------------------------------------|--------------------|-------|-----|--------|--|
| 5'-    | ccccagcacuagagcagaggcgaggagggcgguugacccacccgcgcgaucucucugaggggaucgagugggcagcagcuaggaguu | gaucgcgcgcgcguuuug | -3'   | exp |        |  |
| .....  | ((((((((.....(((.....(((.....(((.....)))))).....)))))).....)))))).....))))))            |                    | reads | mm  | sample |  |
| .....  | gcgggagagggcgguugac.....                                                                |                    | 2     | 0   | DC2    |  |
| .....  | gcgggagagggcgguugaU.....                                                                |                    | 1     | 1   | DC4    |  |
| .....  | gcgggagagggcgguugac.....                                                                |                    | 2     | 0   | DC4    |  |
| .....  | .....caccgcgcgcgaucucucugag.....                                                        |                    | 1     | 0   | ID7    |  |
| .....  | .....cgaggagggcgguugaG.....                                                             |                    | 1     | 1   | ID2    |  |

**R.**

|                        |              |
|------------------------|--------------|
| Provisional ID         | : chrX_38905 |
| Score total            | : 2.1        |
| Score for star read(s) | : -1.3       |
| Score for read counts  | : 0          |
| Score for mfe          | : 2.4        |
| Score for randfold     | : 1.6        |
| Score for cons. seed   | : -0.6       |
| Total read count       | : 39         |
| Mature read count      | : 39         |
| Loop read count        | : 0          |
| Star read count        | : 0          |

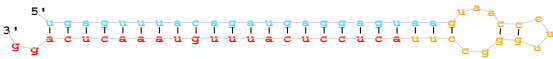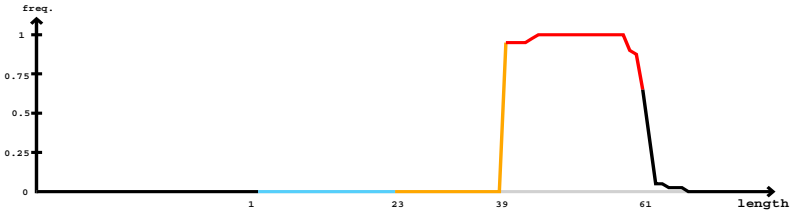

# QXBT18

chrX:129790441..129790501:+

|                                                                                                                          | Star                                                                                                                  | Mature |     |  |        |
|--------------------------------------------------------------------------------------------------------------------------|-----------------------------------------------------------------------------------------------------------------------|--------|-----|--|--------|
| 5'-                                                                                                                      | gcctgggagcauuagaaccugaaucuccuggcgcugaguuacacagcaggaggaguaaguaaacccugggcucuacucucucauuuguaaaacucaggccaacaauaaccauuaccu | -3'    | exp |  |        |
|                                                                                                                          | reads                                                                                                                 | mm     |     |  | sample |
| .....(((f(f(.....))..)))((((((((((((((((((((((((((.....((...))..)))))))))))))))))))))))))))))))))))))))))))))))))))))))) | 1                                                                                                                     | 0      |     |  | DC2    |
| .....acuccucauuuguaaaacucagg.....                                                                                        | 1                                                                                                                     | 0      |     |  |        |
| .....acuccucauuuguaaaacucagg.....                                                                                        | 2                                                                                                                     | 0      |     |  | DC7    |
| .....acuccucauuuguaaaacucagg.....                                                                                        | 1                                                                                                                     | 0      |     |  | DC7    |
| .....acuccucauuuguaaaacuc.....                                                                                           | 3                                                                                                                     | 0      |     |  | DC4    |
| .....acuccucauuuguaaaacucaggC.....                                                                                       | 1                                                                                                                     | 1      |     |  | DC4    |
| .....acuccucauuuguaaaacucagg.....                                                                                        | 1                                                                                                                     | 0      |     |  | DC4    |
| .....acuccucauuuguaaaacucaggA.....                                                                                       | 1                                                                                                                     | 1      |     |  | DC4    |
| .....acuccucauuuguaaaacuf.....                                                                                           | 1                                                                                                                     | 1      |     |  | iD7    |
| .....acuccucauuuguaaaacuca.....                                                                                          | 1                                                                                                                     | 0      |     |  | iD7    |
| .....acuccucauuuguaaaacucagg.....                                                                                        | 2                                                                                                                     | 0      |     |  | iD7    |
| .....acuccucauuuguaaaacucagg.....                                                                                        | 9                                                                                                                     | 0      |     |  | iD7    |
| .....acuccucauuuguGaaaacucagg.....                                                                                       | 1                                                                                                                     | 1      |     |  | iD7    |
| .....acuccucauuuguaaaacucagfu.....                                                                                       | 1                                                                                                                     | 1      |     |  | iD7    |
| .....ucacuuuguaaaacucaggcca.....                                                                                         | 1                                                                                                                     | 0      |     |  | iD7    |
| .....ucuuuguaaaacucaggccaafA.....                                                                                        | 1                                                                                                                     | 1      |     |  | iD7    |
| .....acuccCcauuuguaaaacucagg.....                                                                                        | 1                                                                                                                     | 1      |     |  | iD2    |
| .....acuccucauuuguaaaacucagg.....                                                                                        | 2                                                                                                                     | 0      |     |  | iD2    |
| .....acuccucauuuguaaaacucaggA.....                                                                                       | 1                                                                                                                     | 1      |     |  | iD2    |
| .....acuccucauuuguaaaacucagg.....                                                                                        | 3                                                                                                                     | 0      |     |  | iD2    |
| .....acuccucauuuguaaaacucagg.....                                                                                        | 1                                                                                                                     | 0      |     |  | iD4    |
| .....acuccucauuuguaaaacuca.....                                                                                          | 1                                                                                                                     | 1      |     |  | iD4    |
| .....acuccucauuuguaaaacucagg.....                                                                                        | 1                                                                                                                     | 0      |     |  | iD4    |
| .....acuccucauuuguaaaacucagfu.....                                                                                       | 2                                                                                                                     | 1      |     |  | iD4    |
| .....acucccfAuuuuguaaaacucagg.....                                                                                       | 1                                                                                                                     | 1      |     |  | iD4    |

S.

|                        |   |            |
|------------------------|---|------------|
| Provisional ID         | : | chr8_12884 |
| Score total            | : | 2.1        |
| Score for star read(s) | : | -1.3       |
| Score for read counts  | : | 0          |
| Score for mfe          | : | 2.4        |
| Score for randfold     | : | 1.6        |
| Score for cons. seed   | : | -0.6       |
| Total read count       | : | 171        |
| Mature read count      | : | 171        |
| Loop read count        | : | 0          |
| Star read count        | : | 0          |

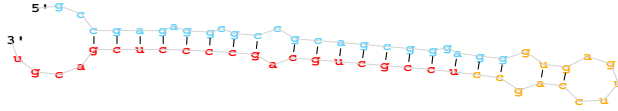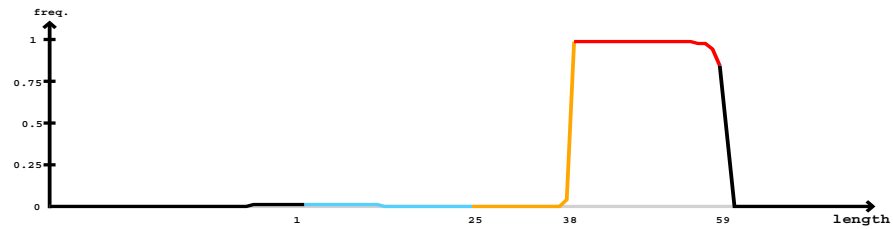

# QXBT19

chr8:55880664..55880722:-

[illegible]

T.

|                        |              |
|------------------------|--------------|
| Provisional ID         | : chr17_7803 |
| Score total            | : 1.3        |
| Score for star read(s) | : -1.3       |
| Score for read counts  | : 0          |
| Score for mfe          | : 1.6        |
| Score for randfold     | : 1.6        |
| Score for cons. seed   | : -0.6       |
| Total read count       | : 18         |
| Mature read count      | : 18         |
| Loop read count        | : 0          |
| Star read count        | : 0          |

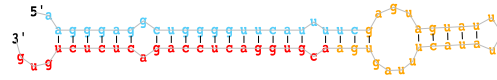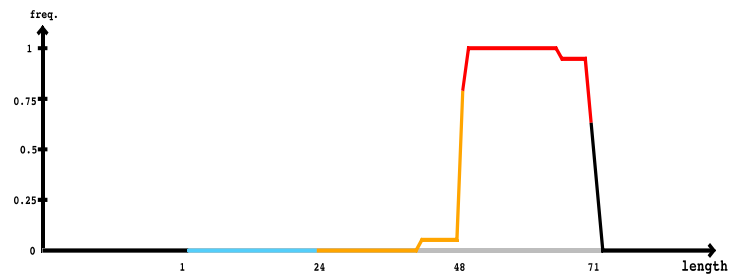

QXBT20  
chr17:42311190..42311260:+

[illegible]

U.

|                        |              |
|------------------------|--------------|
| Provisional ID         | : chr17_5067 |
| Score total            | : 22.9       |
| Score for star read(s) | : 3.9        |
| Score for read counts  | : 12.4       |
| Score for mfe          | : 2          |
| Score for randfold     | : 1.6        |
| Score for cons. seed   | : 3          |
| Total read count       | : 36         |
| Mature read count      | : 32         |
| Loop read count        | : 0          |
| Star read count        | : 4          |

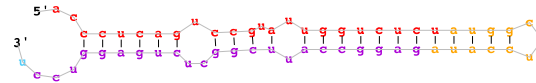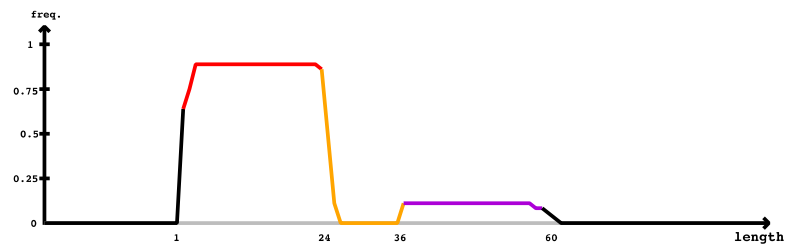

QXBT21  
chr17:7306830..7306888:-

[illegible]



V.

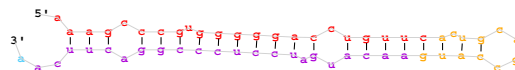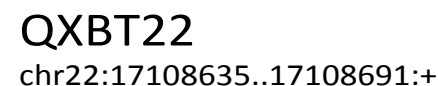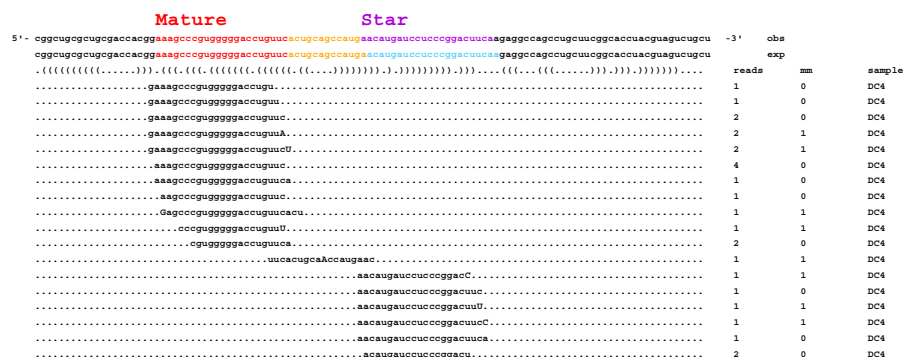

**Figure S4. Twenty-two** novel miRNA structures and reads mapping graphs (A-V) from a miRDeep2 analysis. For each novel miRNA graph, the upper left table gives the miRDeep2 score break-down for the reported miRNA. The upper right figure shows the predicted miRNA hairpin structure. The middle density plot shows the distribution of reads in the predicted precursor sequence. The sequences below indicate reads align to the precursor with the positions of the mature, loop and star strand. The red color denotes the mature sequence; the yellow color denotes the loop sequence and the purple color denotes the star sequence.

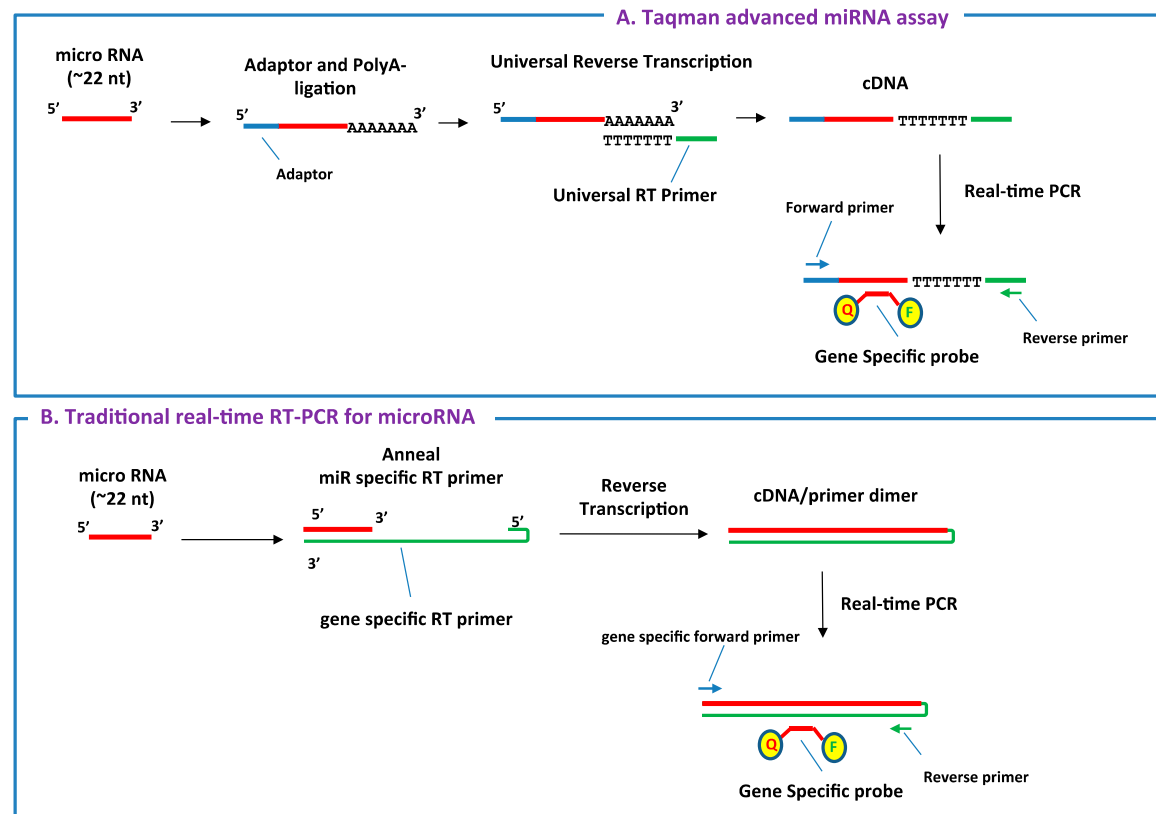

**Figure S5.** The schematic diagram for advanced and traditional microRNA (miRNA) qPCR assays. **(A)** In the advanced miRNA assay, the universal RT primer (containing poly(T)) binds to the polyA tail to synthesize cDNA. **(B)** In the traditional miRNA assay, the miR specific RT primer binds to miRNA to form cDNA/primer dimer.

**Table S1.** Summary of sequenced immature dendritic cells (iDCs) and IL-27-treated iDCs (27DCs) small RNA library.

| Sample ID | Yield (M bases) | Number of raw reads | Number of clean reads | Percentage of clean reads (%) | Number of mapped reads | Percentage of mapped reads (%) |
|-----------|-----------------|---------------------|-----------------------|-------------------------------|------------------------|--------------------------------|
| iDC_2     | 2968            | 58182414            | 24040126              | 41.32                         | 23200067               | 96.51                          |
| iDC_4     | 2918            | 57207937            | 27830481              | 48.65                         | 27209972               | 97.77                          |
| iDC_7     | 3503            | 68673789            | 34474974              | 50.20                         | 33435206               | 96.98                          |
| 27DC_2    | 2513            | 49259191            | 21794678              | 44.24                         | 21211384               | 97.32                          |
| 27DC_4    | 2624            | 51456830            | 27426267              | 53.30                         | 26484335               | 96.57                          |
| 27DC_7    | 3224            | 63214830            | 24401275              | 38.60                         | 23652580               | 96.93                          |
